# Supplementary material
Source: PubMed Central journal article supplement (PMC6637738)
Supplement: NIHMS1040621-supplement-Supplemental.pdf [file NIHMS1040621-supplement-Supplemental.pdf]

# THE LANCET

## Supplementary appendix

This appendix formed part of the original submission. We post it as supplied by the authors.

Supplement to: Uyeki TM, Katz JM, Jernigan DB. Novel influenza A viruses and pandemic threats. *Lancet* 2017; **389**: 2172–74.

## Public health concerns regarding avian influenza A(H7N9) virus

### *Virology and Pathogenesis*

- \*LPAI A(H7N9) viruses are circulating widely among poultry in China, with increased spread from eastern to central and western China, and potential for introduction into adjacent Southeast Asia countries
- \*Recent evolution from LPAI to HPAI A(H7N9) viruses<sup>1</sup>
- \*Demonstrated binding to human upper and lower respiratory tract tissues (ability to infect the human upper respiratory tract is thought to be a pre-requisite for increased transmission among humans)
- \*Has molecular markers conferring increased virulence, adaptation, transmissibility, and pulmonary replication in mammals
- \*Infection triggers dysregulated cytokine response resulting in pulmonary inflammation
- \*Resistant to the adamantane class of antiviral drugs
- \*Evolution into multiple antigenic groups in poultry, no longer matched by currently stockpiled vaccines based on older virus strains

### *Epidemiology*

- \*Unique as a LPAI virus causing high number of human infections with high mortality
- \*Annual fall-winter-spring epidemics of human infections since 2013
- \*Human infections in current 5<sup>th</sup> epidemic exceed total infections in 3 prior epidemics
- \*Highest number of human infections of all novel influenza A viruses
- \*Human infections have occurred in many new areas in eastern, central, and western China in 2017
- \*Human infections continue to be associated with exposures to poultry at live bird markets in urban, semi-urban and rural areas, and while raising backyard poultry
- \*Limited human-to-human transmission between family relatives and between unrelated persons
- \*Human infections have been exported in travelers from mainland China to Taiwan, Malaysia, and Canada
- \*High severity with mortality of approximately 40% in hospitalized patients
- \*Sero-surveys suggest very limited immunity among humans of all ages
- \*Overall denominator of infected persons is unknown

### *Clinical*

- \*Wide clinical spectrum from asymptomatic infection, upper respiratory tract illness, to severe pneumonia, respiratory failure, ARDS, refractory hypoxemia, and multi-organ failure
- \*High proportion of hospitalized patients have critical illness, requiring intensive care and advanced organ support
- \*Resistance to neuraminidase inhibitor (NAI) antiviral drugs reported during treatment
- \*No clinical trials of investigational therapies in A(H7N9) patients, including for treatment of NAI-resistant infections (limited treatment options)
- \*Nosocomial transmission (patient-to-patient, and patient-to-health care worker) reported
- \*Potential for even more severe disease and extrapulmonary dissemination with HPAI virus infection

---

<sup>1</sup>LPAI = low pathogenicity avian influenza; HPAI = highly pathogenic avian influenza. Sources: Published case reports and case series, WHO Disease Outbreak News, WHO Monthly Risk Assessment Summaries

## **Public health preparedness needs for A(H7N9) and other novel influenza A viruses**

- Enhanced surveillance for human illness (mild and severe) and timely reporting of infections
- Enhanced virologic surveillance of novel influenza A viruses in infected humans, with timely sharing of genetic sequence data and virus isolates for analyses, and for assessment of candidate vaccine virus development
- Detailed epidemiologic investigations (including joint public health-animal health investigations) of sporadic cases and clusters of human infection and monitoring of exposed close contacts to assess human-to-human transmission; for early isolation, testing, and treatment of symptomatic persons
- Expanded surveillance of influenza A viruses in animals (poultry, pigs) at the human-animal interface to inform pandemic risk assessment and preparedness
- New approaches for the timely development of high yielding candidate vaccine viruses
- Development of vaccination strategies that elicit more broadly protective and longer lasting immunity
- Development of new therapeutics against novel influenza A virus targets, with effectiveness against neuraminidase inhibitor-resistant viruses
- Increased animal health laboratory capacity worldwide for detection, isolation, and characterization of influenza A viruses circulating among wild birds and domesticated animals (poultry, pigs)
- Improved respiratory infection prevention and control measures in health care settings worldwide to reduce nosocomial influenza virus transmission
- Establishment of on-going prospective, multi-year, multi-site, and multi-country clinical trial networks and platforms for conducting randomized clinical trials of investigational therapies, including combination treatments, for treatment of severe influenza

## Table references

- Abdel-Ghafar AN, Chotpitayasunondh T, Gao Z, et al, for the Writing Committee of the Second World Health Organization Consultation on Clinical Aspects of Human Infection with Avian Influenza A (H5N1) Virus. Update on avian influenza A (H5N1) virus infection in humans. *N Engl J Med* 2008; **358**: 261–73.
- Chen H, Yuan H, Gao R, et al. Clinical and epidemiological characteristics of a fatal case of avian influenza A H10N8 virus infection: a descriptive study. *Lancet* 2014; **383**: 714–21.
- Cheng VC, Chan JF, Wen X, et al. Infection of immunocompromised patients by avian H9N2 influenza A virus. *J Infect* 2011; **62**: 394–99.
- Cox NJ, Tock CS, Uyeki TM. Public health implications of animal influenza viruses. In: Swayne DE, ed. *Animal Influenza*. 2nd edn. Hoboken, NJ: Wiley-Blackwell, 2017: 92–132.
- Freidl GS, Meijer A, de Bruin E, et al. Influenza at the animal-human interface: a review of the literature for virological evidence of human infection with swine or avian influenza viruses other than A(H5N1). *Euro Surveill* 2014; **19**: 20793.
- Gao HN, Lu HZ, Cao B, et al. Clinical findings in 111 cases of influenza A (H7N9) virus infection. *N Engl J Med* 2013; **368**: 2277–85.
- Gao R, Cao B, Hu Y, et al. Human infection with a novel avian-origin influenza A (H7N9) virus. *N Engl J Med* 2013; **368**: 1888–97.
- Jhung MA, Epperson S, Biggerstaff M, et al. Outbreak of variant influenza A(H3N2) virus in the United States. *Clin Infect Dis* 2013; **57**: 1703–12.
- Jiang H, Wu P, Uyeki TM, et al. Preliminary epidemiologic assessment of human infections with highly pathogenic avian influenza A(H5N6) virus, China. *Clin Infect Dis* 2017; published online April 12. DOI:10.1093/cid/cix334.
- Ke L, Mok CKP, Zhu W, et al. Human infection with highly pathogenic avian influenza A virus (H7N9), China. *Emerg Infect Dis*. 2017;*in-press*
- Liu M, Li X, Yuan H, et al. Genetic diversity of avian influenza A (H10N8) virus in live poultry markets and its association with human infections in China. *Sci Rep* 2015; **5**: 7632.
- Myers KP, Olsen CW, Gray GC. Cases of swine influenza in humans: a review of the literature. *Clin Infect Dis* 2007; **44**: 1084–88.
- Shinde V, Bridges CB, Uyeki TM, et al. Triple-reassortant swine influenza A (H1) in humans in the United States, 2005–2009. *N Engl J Med* 2009; **360**: 2616–25.
- WHO. Influenza at the human–animal interface. Summary and assessment, 21 April to 16 May 2017. [http://www.who.int/influenza/human\\_animal\\_interface/Influenza\\_Summary\\_IRA\\_HA\\_interface\\_05\\_16\\_2017.pdf?ua=1](http://www.who.int/influenza/human_animal_interface/Influenza_Summary_IRA_HA_interface_05_16_2017.pdf?ua=1) (accessed May 23, 2017).
- WHO. Influenza at the human–animal interface. Summary and assessment, 16 March to 20 April 2017. [http://www.who.int/influenza/human\\_animal\\_interface/Influenza\\_Summary\\_IRA\\_HA\\_interface\\_04\\_20\\_2017.pdf?ua=1](http://www.who.int/influenza/human_animal_interface/Influenza_Summary_IRA_HA_interface_04_20_2017.pdf?ua=1) (accessed April 28, 2017).

WHO. Influenza at the human–animal interface. Summary and assessment, 20 July to 3 October 2016. [http://www.who.int/influenza/human\\_animal\\_interface/Influenza\\_Summary\\_IRA\\_HA\\_interface\\_10\\_03\\_2016.pdf?ua=1](http://www.who.int/influenza/human_animal_interface/Influenza_Summary_IRA_HA_interface_10_03_2016.pdf?ua=1) (accessed April 28, 2017).

WHO. Influenza at the human-animal interface. Summary and assessment, 21 January to 25 February 2016. [http://www.who.int/influenza/human\\_animal\\_interface/Influenza\\_Summary\\_IRA\\_HA\\_interface\\_25\\_02\\_2016.pdf?ua=1](http://www.who.int/influenza/human_animal_interface/Influenza_Summary_IRA_HA_interface_25_02_2016.pdf?ua=1) (accessed April 28, 2017).

Zhang F, Bi Y, Wang J, et al. Human infections with recently-emerging highly pathogenic H7N9 avian influenza virus in China. *J Infect* 2017; published online April 6. DOI:10.1016/j.jinf.2017.04.001.

Zhou L, Tan Y, Kang M, et al. Preliminary epidemiology of human infections with highly pathogenic avian influenza A(H7N9) virus, China, 2017. *Emerg Infect Dis* 2017 (in-press).

Zhu W, Zhou J, Li Z, et al. Biological characterisation of the emerged highly pathogenic avian influenza (HPAI) A(H7N9) viruses in humans, in mainland China, 2016 to 2017. *Euro Surveill* 2017; **22**: 30533.
